# Supplementary material
Source: Springer Nature journal article supplement (https://www.springermedizin.de/resource/supplementary/12889_2011_4979_MOESM2_ESM.pdf/9493008)

# Product-Limit Survival Estimates

With Number of Subjects at Risk

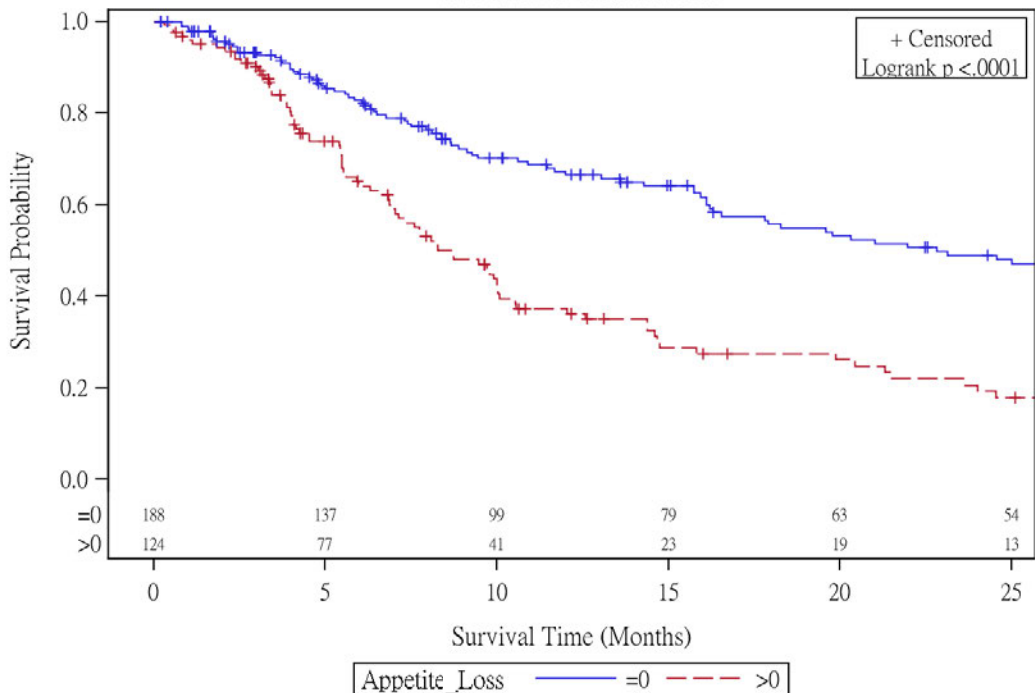

Supplement: MOESM2 [file 9493008]
